# Supplementary material
Source: publisher site journal article supplement (https://www.dovepress.com/article/603264)
Supplement: Supplementary file 1 [file 603264%20Supplementary%20appendix%20Table%20S1.docx]

**Table S1 Food List**

| Food Category（11categories） | Food Items（154 varieties） |
| --- | --- |
| Staple Foods | Rice,Noodles/Pasta,Buns,Dumplings,Bread/Cakes/Cookies,Mantou/Steamed Twisted Rolls, Pancakes, Baked Flatbread, Congee/Porridge, Liangpi, Rice Noodles, Fried Dough Twists/Oil Cakes, Oatmeal, Instant Noodles, Glass Noodles |
| Vegetables | Spinach, Green Vegetables, Bean Sprouts, Cauliflower, Chinese Cabbage, Lettuce, Garlic Sprouts (Garlic), Amaranth, Potatoes, Lettuce, Chinese Cabbage, Celery, Rapeseed, Chives, Coriander, Cabbage, Garlic Sprouts, Potato, Lotus Root, Chinese Kale, Winter Melon, Wax Gourd, Cucumber, Pumpkin, Sponge Gourd, Zucchini, Tomato, Eggplant, Cucumber, Green Beans, Edamame, Peas, Carrots, White Radish, Mung Bean Sprouts, Bitter Melon, Crown Daisy, Mustard Greens, Cabbage, Sweet Potato, Corn, Hair Vegetable, Eight-treasure Pickles |
| Fungi | Shiitake Mushrooms, Oyster Mushrooms, Straw Mushrooms, White Fungus, Kelp, Seaweed, Black Fungus |
| Soy Products | Soybeans, Green Soybeans, Black Soybeans, Tofu, Tofu Pudding, Soy Milk, Tofu Skin, Dried Tofu, Mung Beans, Fermented Tofu, Yuba |
| Dairy and Eggs | Milk, Soy Milk, Yogurt, Cheese, Cream, Quail Eggs, Chicken Eggs, Duck Eggs, Salted Duck Eggs, Preserved Eggs |
| Meat | Pork, Beef, Lamb, Poultry (Chicken, Duck, Goose), Animal Liver, Animal Blood |
| Aquatic Products | Sea Cucumber, Loach, Eel, Shrimp, Crab, Jellyfish, Squid, Clams, Bighead Carp, Cod, Crucian Carp, Grass Carp, Carp, Hairtail |
| Fruits | Oranges, Watermelon, Pineapple, Apple, Longan, Pear, Grapes, Bananas, Kiwifruit, Fresh Peaches, Apricots, Cherries, Mulberries, Melons, Hawthorn, Strawberries, Lemons, Coconuts, Mangoes, Walnuts, Starfruit, Tangerines, Durian |
| Nuts | Raisins, Dates, Walnuts, Peanuts, Chestnuts, Almonds, Pine Nuts, Dried Persimmon, Pumpkin Seeds, Sunflower Seeds, Watermelon Seeds |
| Snacks | Chocolate, Biscuits, Candies, Potato Chips, Beef Jerky, Hawthorn Roll, Sausage, Ham Sausage, Ice Cream |
| Beverages | Carbonated Drinks, Fruit Juices, Almond Milk, Other Sugary Drinks |
